# Supplementary material
Source: MDPI journal article supplement (https://www.mdpi.com/1999-4907/14/10/2104)
Supplement: s1 [file s1 › forests-2640732-supplementary.pdf]

# Supplement Figure S1-S5:

|                            |                                              |     |
|----------------------------|----------------------------------------------|-----|
| Unspliced_form_of_CpbZIP11 | GGTTTGCAGTCGGGCAGCGCATTGTTGGTCTTCCATAACCA    | 638 |
| Spliced_form_of_CpbZIP11   | GGTTTGCAGTCGGGCAGCGCATTGTTGGTCTTCCATAACCA    | 640 |
| Consensus                  | ggtttgcagtcgggcagcgcatttggtgcttccataacca     |     |
| Unspliced_form_of_CpbZIP11 | AGCAGGAGTCTGCTGTGCTCTTGTGGAAATCCCTGCTGTT     | 678 |
| Spliced_form_of_CpbZIP11   | AGCAGGAGTCTGCTGT.....T                       | 657 |
| Consensus                  | agcaggagtctgctgt.....t                       |     |
| Unspliced_form_of_CpbZIP11 | GGGTTCCCTGCTTTGGTTCCCTGGGCATCATGTGCCTATTCT   | 718 |
| Spliced_form_of_CpbZIP11   | GGGTTCCCTGCTTTGGTTCCCTGGGCATCATGTGCCTATTCT   | 697 |
| Consensus                  | gggttccctgctttggttccctgggcacatcatgtgcctattct |     |
| Unspliced_form_of_CpbZIP11 | ACTCTGCCCACCATGCCCCATTCAATTCTGAAAAGGGTTT     | 758 |
| Spliced_form_of_CpbZIP11   | ACTCTGCCCACCATGCCCCATTCAATTCTGAAAAGGGTTT     | 737 |
| Consensus                  | actctgcccaccatgccccattcaattctgaaaagggttt     |     |
| Unspliced_form_of_CpbZIP11 | CACTGGAAAACGTAGGAAAGAAAAATCCAGGAGTGGCTCT     | 798 |
| Spliced_form_of_CpbZIP11   | CACTGGAAAACGTAGGAAAGAAAAATCCAGGAGTGGCTCT     | 777 |
| Consensus                  | cactggaaaacgtaggaaagaaaaatccaggagtggctct     |     |
| Unspliced_form_of_CpbZIP11 | AGGAGGGTCAAAAAGTAAGATGTTTGGATTCTTGATGGTC     | 838 |
| Spliced_form_of_CpbZIP11   | AGGAGGGTCAAAAAGTAAGATGTTTGGATTCTTGATGGTC     | 817 |
| Consensus                  | aggaggggtcaaaaagtaagatgtttggattcttgatggtc    |     |
| Unspliced_form_of_CpbZIP11 | CAATCATTGTGTAAGAGTAGGAGATGCAAAGCTTCAAGGA     | 878 |
| Spliced_form_of_CpbZIP11   | CAATCATTGTGTAAGAGTAGGAGATGCAAAGCTTCAAGGA     | 857 |
| Consensus                  | caatcatttgttaaagagtaggagatgcaaagcttcaagga    |     |
| Unspliced_form_of_CpbZIP11 | TGAAGATGAAACCGAATTACCTTGTTCTTTG              | 909 |
| Spliced_form_of_CpbZIP11   | TGAAGATGAAACCGAATTACCTTGTTCTTTG              | 888 |
| Consensus                  | tgaagatgaaaccgaattaccttgttctttg              |     |

Figure S1: Sequencing results comparing unspliced and spliced forms of *CpbZIP11*.

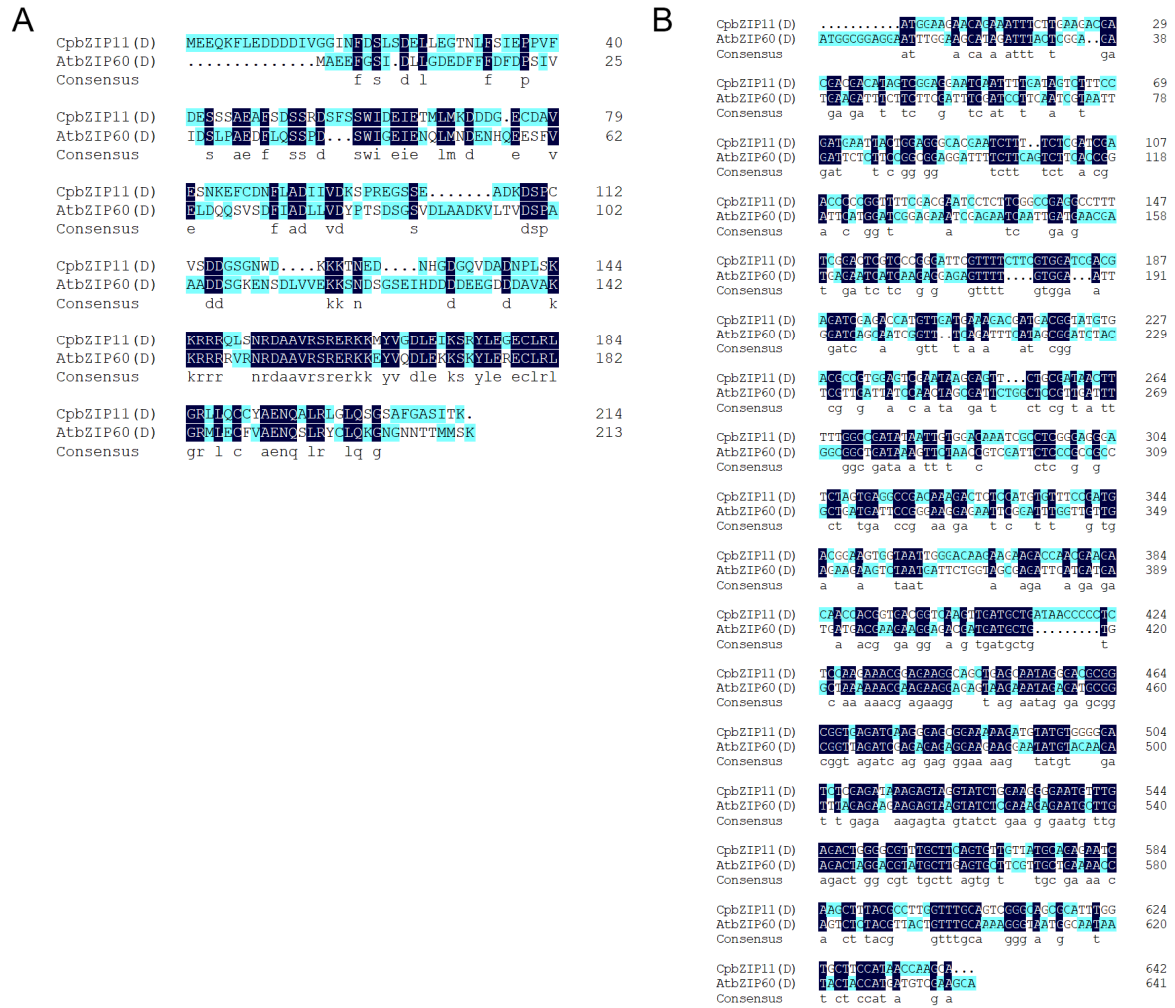

Figure S2: Comparative sequence alignment of nucleotides and amino acids between *Arabidopsis* AtZIP60 (D) and CpbZIP11 (D). (A) Amino acid sequence alignment. (B) Nucleotide sequence alignment.

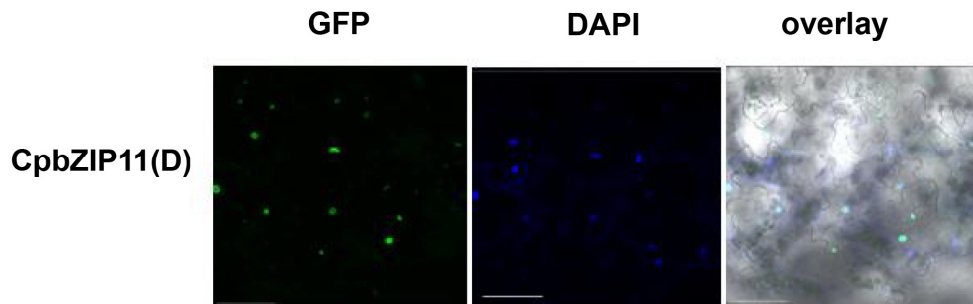

Figure S3: Nuclear localization of the truncated form of *CpbZIP11D* confirmed by DAPI staining. To corroborate the nuclear localization of this truncated form, DAPI staining was executed. DAPI, a stain that binds robustly to adenine–thymine-rich regions in DNA, serves as a primary marker for cell nuclei. Scale bar represents 50  $\mu$ m.

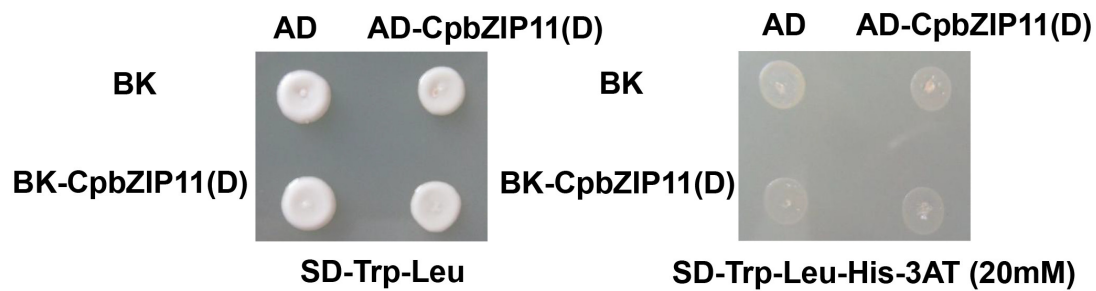

Figure S4: Inability of nuclear form *CpbZIP11(D)* to form homodimers in yeast cells. The cDNA sequence of *CpbZIP11(D)* was cloned into bait vector *pGBKT7* and prey vector *pGADT7*. Upon co-transfection into yeast cells with empty vectors and in the presence of 3-AT to suppress *CpbZIP11(D)* self-activation, it was observed that the homodimer *CpbZIP11(D)* failed to form in yeast.

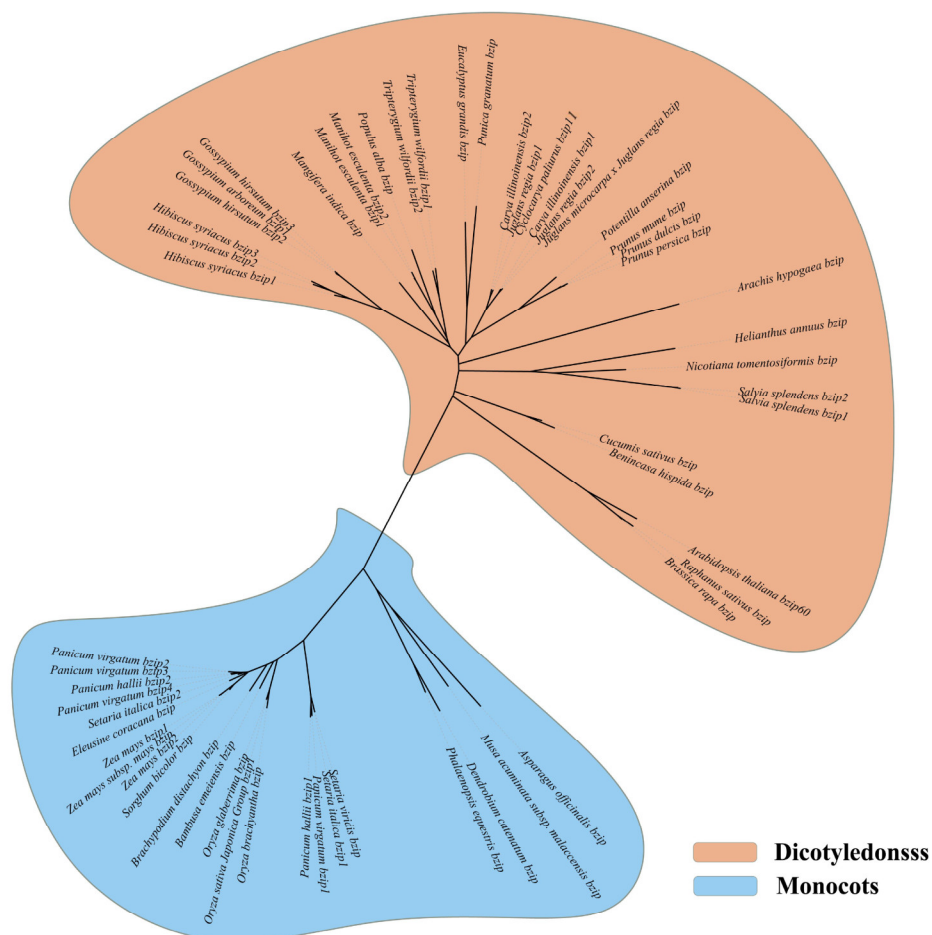

Figure S5: maximum likelihood (ML) phylogenetic analysis of *CpbZIP11* homologous genes among monocots and dicots. Light blue shading represents bZIP family members from monocotyledons, while light brown shading denotes those from dicots.
